# Supplementary material
Source: publisher figshare collection journal article supplement (https://gsapubs.figshare.com/ndownloader/files/22397610)

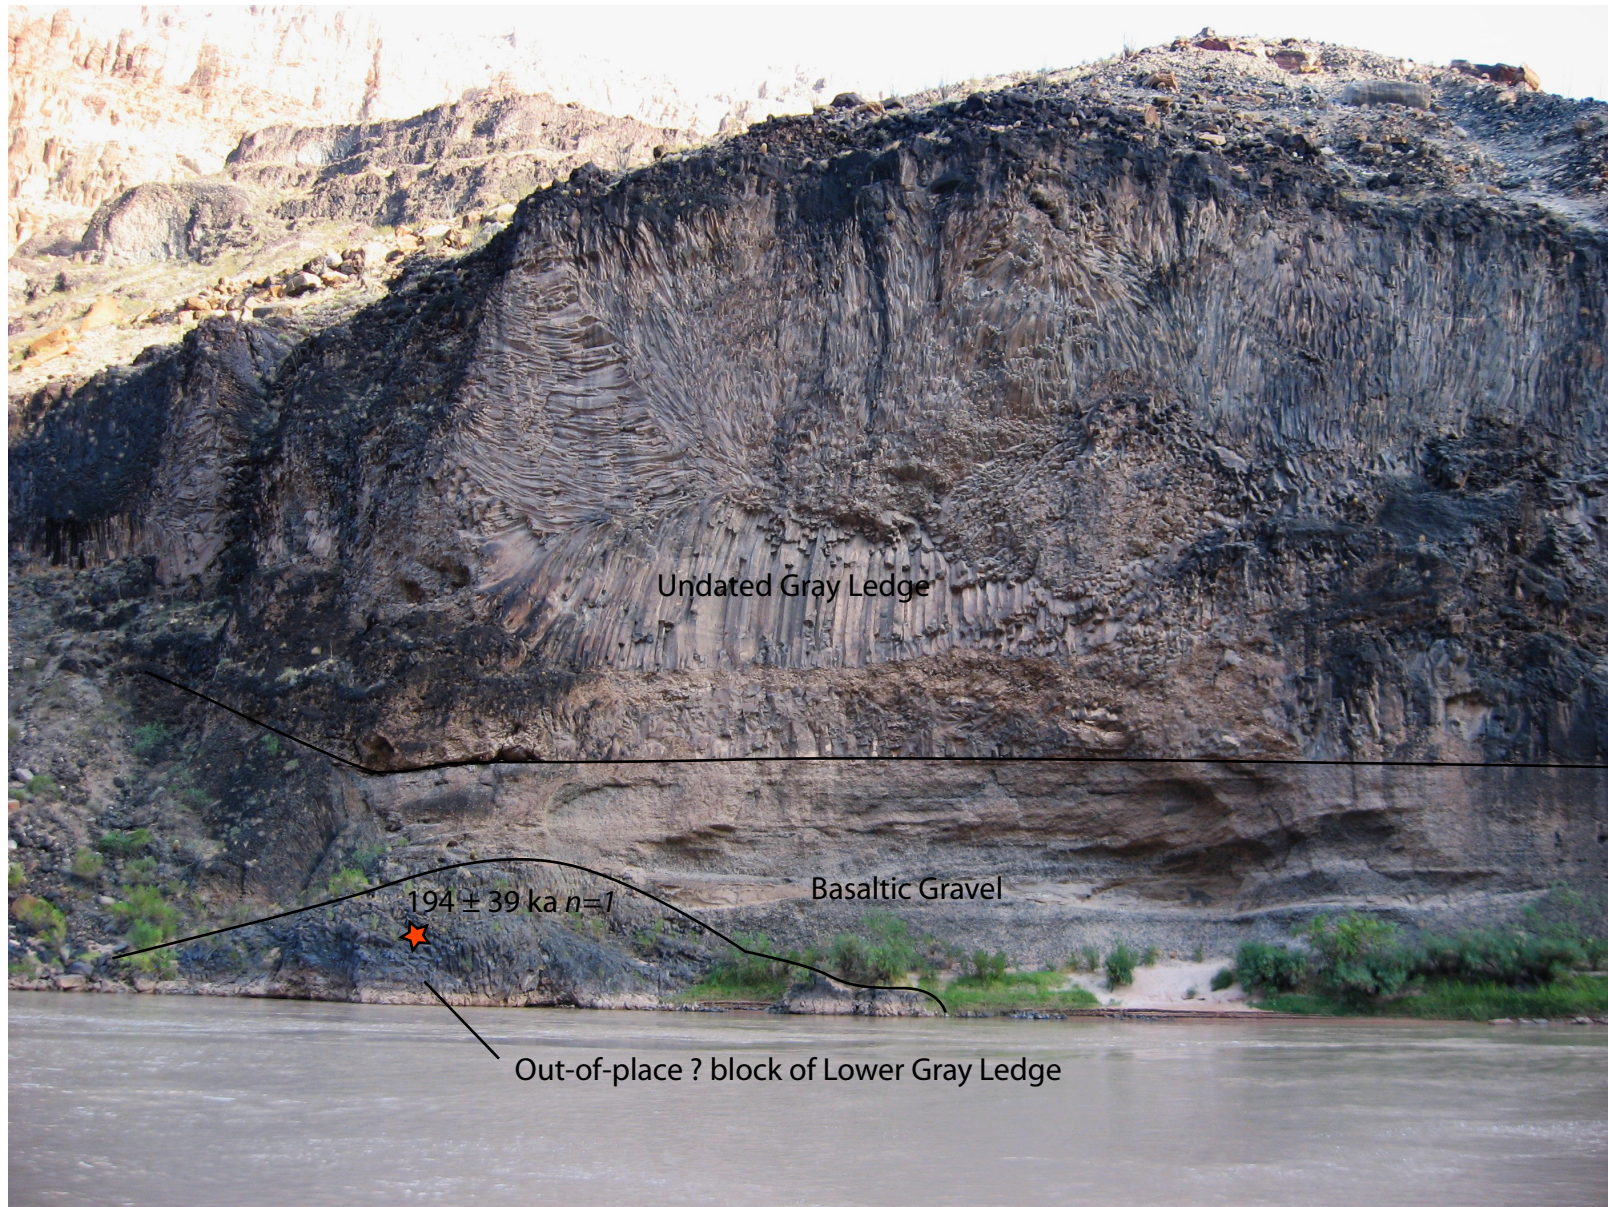

Crow et al., Figure S05

Supplement: Supplementary file 1 [file 22397610]
